# Supplementary material for: Antioxidant and anti-Alzheimer's potential of Tetragonisca angustula (Jataí) stingless bee pollen
Source: PubMed Central journal article supplement (PMC10764861; doi:10.1038/s41598-023-51091-3), 2024-01-03
Supplement: 41598_2023_51091_MOESM1_ESM.pdf [file 41598_2023_51091_MOESM1_ESM.pdf]

**Antioxidant and anti-Alzheimer's potential of *Tetragonisca angustula* (Jataí) stingless bee pollen**

Natalia Carine Lima dos Santos<sup>2\*</sup>, Serena Mares Malta<sup>1</sup>, Rodrigo Rodrigues Franco<sup>1</sup>, Heitor Cappato Guerra Silva<sup>1</sup>, Matheus Henrique Silva<sup>1</sup>, Tamiris Sabrina Rodrigues<sup>1</sup>, Rafael Martins de Oliveira<sup>2</sup>, Thayane Nogueira Araújo<sup>3</sup>, Solange Cristina Augusto<sup>4</sup>, Foued Salmen Espindola<sup>1</sup> & Carlos Ueira-Vieira<sup>1\*</sup>.

<sup>1</sup>Instituto de Biotecnologia, Universidade Federal de Uberlândia, Uberlândia, MG, Brasil.

<sup>2</sup>Instituto de Ciências Biomédicas, Universidade Federal de Uberlândia, Uberlândia, MG, Brasil.

<sup>3</sup>Departamento de Biologia, Faculdade de Filosofia, Ciências e Letras de Ribeirão Preto, Universidade de São Paulo, Ribeirão Preto, Brasil.

<sup>4</sup>Instituto de Biologia, Universidade Federal de Uberlândia, Uberlândia, MG, Brasil.

\*Correspondence to: Natalia Carine Lima dos Santos ([carinenatalia@yahoo.com.br](mailto:carinenatalia@yahoo.com.br)) and Carlos Ueira-Vieira ([ueira@ufu.br](mailto:ueira@ufu.br)).

Laboratório de Genética, Instituto de Biotecnologia, Universidade Federal de Uberlândia, Rua Acre, Bloco 2E, sala 226, Uberlândia, MG, Brasil, 38408-144.

**Table 1.** Evaluation of total polyphenols, condensed tannins, and flavonoids (mean  $\pm$  standard error) content in methanolic extract of *Tetragonisca angustula*.

| <b>Polyphenols</b><br><b>(mg GAE/g)</b> | <b>Condensed tannins</b><br><b>(mg CE/g)</b> | <b>Flavonoids</b><br><b>(mg QE/g)</b> |
|-----------------------------------------|----------------------------------------------|---------------------------------------|
| 357.5 $\pm$ 2.4                         | 207.6 $\pm$ 5.1                              | 277.6 $\pm$ 1.5                       |
